# 1 **Effects of long-term warming and enhanced nitrogen and sulfur deposition on** 2 **microbial communities in a boreal peatland**

3  
4 Magalí Martí<sup>1,2</sup>, Alexander Eiler<sup>3,4,5</sup>, Moritz Buck<sup>3</sup>, Stefan Bertilsson<sup>3</sup>, Waleed Abu Al-  
5 Soud<sup>6,7</sup>, Søren Sørensen<sup>6</sup>, Mats B. Nilsson<sup>8</sup>, Bo H. Svensson<sup>1</sup>

6  
7 <sup>1</sup> Department of Thematic Studies – Environmental Change, Linköping University,  
8 Linköping, Sweden

9 <sup>2</sup> Department of Clinical and Experimental Medicine, Linköping University, Linköping,  
10 Sweden

11 <sup>3</sup> Department of Ecology and Genetics, Limnology and Science for Life Laboratory,  
12 Uppsala University, Uppsala, Sweden

13 <sup>4</sup> eDNA solutions, Environmental DNA and bioinformatics solutions, Mölndal, Sweden

14 <sup>5</sup> Department of Biosciences, Center for BioGeoChemistry in the Anthropocene, Section  
15 for Aquatic Biology and Toxicology, University of Oslo, Oslo, Norway

16 <sup>6</sup> Department of Biology, Section of Microbiology, University of Copenhagen, Copenhagen,  
17 Denmark

18 <sup>7</sup> Department of Clinical Laboratory Sciences, Jouf University, Qurayyat, Saudi Arabia

19 <sup>8</sup> Department of Forest Ecology & Management, Swedish University of Agricultural  
20 Sciences, Umeå, Sweden

21  
22 Corresponding author: Magalí Martí, [magali.marti.genero@liu.se](mailto:magali.marti.genero@liu.se).

## 23 24 25 **Abstract**

26 With ongoing environmental change, it is important to understand ecosystem responses to  
27 multiple perturbations over long time scales at *in situ* conditions. Here, we investigated the  
28 individual and combined effects of 18 years of warming and enhanced nitrogen and sulfate  
29 deposition on peat microbial communities in a nutrient-poor boreal mire. The three  
30 perturbations individually affected prokaryotic community composition, where nitrogen  
31 addition had the most pronounced effect, and its combination with the other perturbations led  
32 to additive effects. The functional potential of the community, characterized by shotgun  
33 metagenomics, was strongly affected by the interactive effects in the combined treatments.  
34 The responses in composition were also partly reflected in the functional gene repertoire and  
35 in altered carbon turnover, i.e. an increase of methane production rates as a result of nitrogen  
36 addition and a decrease with warming. Long-term nitrogen addition and warming-induced  
37 changes caused a shift from *Sphagnum*-dominated plant communities to vascular plant  
38 dominance, which likely transact with many of the observed microbial responses. We  
39 conclude that simultaneous perturbations do not always lead to synergistic effects, but can  
40 also counteract and even neutralize one another, and thus must be studied in combination  
41 when attempting to predict future characteristics and services of peatland ecosystems.

42  
43 **Keywords** Microbial diversity, 16S rRNA, metagenome, peatland, climate change, nitrogen  
44

45

46

47

## 48 **Introduction**

49 Despite key roles of microbial communities in controlling carbon and nutrient dynamics  
50 within ecosystems, few studies have addressed effects of multiple drivers (e.g. anthropogenic  
51 stressors) on microbial taxonomic diversity and the associated genome-encoded traits  
52 underpinning realized ecosystem services (cf. Castro et al. 2010, Li et al. 2013, Andresen et  
53 al. 2014, Shen et al. 2014, Contosta et al. 2015). Given the multitude of human-derived  
54 disturbances, including climate change and atmospheric deposition of anthropogenic  
55 emissions, it is important to understand microbial community responses to multiple and  
56 parallel changes in the environment. Microorganisms will potentially react to such external  
57 impacts by shifting their community composition and function. This may lead to ecosystem  
58 structure repercussions causing feedbacks on e.g. the climate system via changes in  
59 greenhouse gas turnover and other ecosystem-scale processes. However, altered ecosystem  
60 services resulting from microbial community shifts may also be attenuated by functional  
61 redundancy within the community, assuming that many species are able to mediate the same  
62 functions in the ecosystem (Lawton & Brown 1993, Nielsen et al. 2011, Tully et al. 2018).

63 Microbial metabolism is central for most ecosystem services due to its central role in the  
64 turnover of essential nutrients and biogeochemical cycles (Martiny et al. 2015). For example,  
65 changes in the abundance of key microbial taxa able to produce or oxidize methane will  
66 influence the rate of methane emissions from various ecosystems that feature relevant redox  
67 conditions (McCalley et al. 2014). It is now tractable to characterize such genome-encoded  
68 functional traits with community-scale metagenome sequencing.

69 *In situ* manipulation experiments are well suited to test the responses of ecosystems and  
70 their microbial communities to various disturbance scenarios. Except for long-running trials  
71 in agricultural and forestry systems (Ramirez et al. 2010, Fierer et al. 2012, Leff et al. 2015,  
72 Zhou et al. 2015, Boot et al. 2016, Zeng et al. 2016), generally, *in situ* manipulations of soil

73 ecosystems have mainly been conducted over short- to intermediate-length time periods, e.g.  
74 between 1 to 5 years. Thus, several such short time field studies on effects of nitrogen  
75 amendment and warming on diversity, function and abundance of microbial communities  
76 have been reported (Castro et al. 2010, Li et al. 2013, Andresen et al. 2014, Shen et al. 2014,  
77 Contosta et al. 2015). Yet, to identify environmental responses over ecologically relevant  
78 timescales, while at the same time accounting for short-term disturbance effects, long-term (at  
79 least decadal) field experiments are needed (Rinnan et al. 2007, Eriksson et al. 2010a,  
80 Contosta et al. 2015). Moreover, as all ecosystems are influenced by multiple stressors, we  
81 need to understand how interactive effects of multiple effectors (synergistic or antagonistic  
82 perturbations) influence microbial communities if we are to robustly predict ecosystem  
83 responses to global warming, changes in atmospheric nutrient deposition and anthropogenic  
84 pollution in general.

85 Ever since the last de-glaciation, northern peatlands have played an important role in the  
86 global carbon balance, and are currently estimated to hold 30% of the global soil carbon, i.e.  
87 carbon stocks estimated at 270 - 600 Pg of organic C (Gorham 1991, Turunen et al. 2002, Yu  
88 2012). Due to slow rates of microbial decomposition, there is an imbalance between primary  
89 production and degradation in these ecosystems. Thus, undisturbed peatlands are generally  
90 contemporary net sinks of carbon dioxide (CO<sub>2</sub>), while at the same time being significant  
91 sources of methane (CH<sub>4</sub>) to the atmosphere (Roulet et al. 2007, Nilsson et al. 2008, Turetsky  
92 et al. 2014). Therefore, the impact of the predicted global climate change and atmospheric  
93 nitrogen (N) and sulfate (S) deposition on the peatland net ecosystem carbon balance (NECB)  
94 is a topic of major concern (Granberg et al. 2001, Galloway et al. 2004, Gauci et al. 2004,  
95 Phoenix et al. 2012).

96 Increased N availability is known to strongly affect plant species composition and  
97 performance of different plant functional types in peatlands (Damman 1988, Bridgham et al.

98 1996, Eppinga et al. 2010, Limpens et al. 2011) as N is often a limiting nutrient (Wang &  
99 Moore 2014). This is clearly demonstrated by the shift towards vascular plant-dominated  
100 vegetation in the long-term high N deposition experiment at Degerö Stormyr (Wiedermann et  
101 al. 2007, Eriksson et al. 2010a, Eriksson et al. 2010b). As a result, methane emissions  
102 increased in response to the enhanced N deposition (Eriksson et al. 2010b), whereas warming  
103 led to a decrease in methane production, oxidation and emissions (Eriksson et al. 2010a,  
104 Eriksson et al. 2010b).

105 It has been argued that novel mechanistic insights on biogeochemical dynamics can be  
106 obtained by studying peat microbial community composition and function, and that such  
107 information can further improve predictions of ecosystem responses to global change  
108 (Bragazza et al. 2015). To investigate the isolated and interactive effects of warming, N and S  
109 deposition on the peat microbial community and function, we applied high throughput  
110 sequencing approaches to peat samples collected after 18 years of continuous *in situ* field  
111 manipulation. We took advantage of a full factorial experimental design that was established  
112 at Degerö Stormyr in 1995, consisting of nitrogen ( $\text{NH}_4\text{NO}_3$ ) and sulfate ( $\text{Na}_2\text{SO}_4$ )  
113 amendments and warming (plots scale green-house covers) simulating the predicted effect of  
114 climate change (Granberg et al. 2001). Overall, simulated increased N deposition had the  
115 most pronounced effect on bacterial as well as archaeal communities. Multiple stressors  
116 interacted to give responses at the level of taxonomic and functional diversity, which  
117 influenced the functional potential of the ecosystem with regards to methane production,  
118 sulfate reduction, nitrate reduction and polymer hydrolysis. Thus, our experiment emphasizes  
119 the need to study the effects of climate change on microbial communities in the context of  
120 multiple environmental changes and anthropogenic-induced perturbations.

121

## 122 **Materials and Methods**

## 123 **Site description and peat samples collection**

124 Peat samples were collected from a full factorial experimental design in a *Sphagnum*-  
125 dominated oligotrophic area at Degerö Stormyr, in North Sweden (64°11'N, 19°33'E, altitude  
126 270 m above sea level). Briefly, the experimental site is a boreal oligotrophic minerogenic  
127 mire, with a surface water pH of ~4.5. The climate of the reference period (1961-1990) was  
128 characterized by a mean annual precipitation of 523 mm, a mean annual temperature of 1.2°C,  
129 and a mean July and January temperatures of 14.7°C and -12.4°C, respectively. Average  
130 weather conditions during 2001-2012 were as follows (Peichl et al. 2014): annual and  
131 growing season air temperatures 2.3°C and 11°C, respectively, annual and growing season  
132 precipitation of 666 and 395 mm, respectively, and the growing season mean water table level  
133 at 14 cm below peat surface. The dominant vascular plants are *Eriophorum vaginatum* (L),  
134 *Andromeda polifolia* (L). and *Vaccinium oxycoccos* (L.). The dominant moss species are  
135 *Sphagnum balticum* (Russ) C. Jens. and, *S. lindberghii* (Schimp). The experiment was  
136 established in 1995 (Granberg et al. 2001) and was conducted according to a full factorial  
137 experimental design including two levels of nitrogen (N) i.e. ambient (low-level) at 2 kg N ha<sup>-1</sup>  
138 yr<sup>-1</sup> and amendment (high-level) of NH<sub>4</sub>NO<sub>3</sub> to reach a deposition at a level of 30 kg N ha<sup>-1</sup>  
139 yr<sup>-1</sup>, two levels of sulfur (S) i.e. ambient at 3 kg S ha<sup>-1</sup> yr<sup>-1</sup>, and amendment of Na<sub>2</sub>SO<sub>4</sub> to a  
140 level of 20 kg S ha<sup>-1</sup> yr<sup>-1</sup>, and two levels of greenhouse (GH) treatment, i.e. high level GH  
141 with a transparent cover or ambient (low level) of GH i.e. without a cover. Each experimental  
142 combination was performed in duplicate. The elevated levels of N and S correspond to the  
143 annual deposition amounts in southwest Sweden at the time for the start of the experiment.  
144 For a detailed description of the site and experimental design see Granberg et al. (2001), and  
145 for details on treatment effects on vegetation composition see Wiedermann et al. (2007). One  
146 peat core (0-40cm) was collected from each field plot (n=16) on August 14<sup>th</sup> and 15<sup>th</sup> 2013.  
147 From each core, 5 cm<sup>3</sup> of peat were subsampled at five depths from below the *Sphagnum*

148 surface: 7-11 cm (A), 11-15 cm (B), 15-19 cm (C), 19-23 cm (D) and 23-27 cm (E). The  
149 samples were stored in 50 mL sterile tubes containing 2 mL of LifeGuard™ Soil Preservation  
150 Solution (MoBio Laboratories, Hameenlinna, Finland), and kept at room temperature (<20°C)  
151 for at most 24 hours before freezing at -20°C.

152

### 153 **Sample preparation**

154 Before extraction, peat samples were thawed over night at 4°C and centrifuged at 2500 x g for  
155 5 min. Total RNA and DNA were co-isolated from 2 g wet peat and recovered in 50 µl using  
156 the RNA PowerSoil® Total RNA Isolation Kit together with the RNA PowerSoil® DNA  
157 Elution Accessory Kit (MoBio Laboratories), according to manufacturer's instructions.

158 Extract concentrations were measured with the Quant-iT RNA HS assay and the Quant-iT  
159 dsDNA HS assay kits together with the Qubit fluorometer (Invitrogen, Lidingö, Sweden). The  
160 RNA and DNA extraction yields ranged 2.5 - 122 ng µl<sup>-1</sup> and 0.5 - 600 ng µl<sup>-1</sup>, respectively.

161 Two extractions from each sample were performed and combined after extraction. RNA  
162 combined extractions were concentrated using the RNA Clean & Concentrator™-25 (Zymo  
163 Research, Taby, Sweden), in accordance with the manufacturer's instructions. DNA was  
164 concentrated by the use of a Vacufuge® vacuum concentrator 5301 (Eppendorf, Horsholm,  
165 Denmark). DNA residues were removed from the concentrated RNA extracts by digestion  
166 using 2U TURBO DNase (Ambion-Life Technologies, Stockholm, Sweden) for 1 h at 37°C  
167 and according to manufacturer's instructions. Reverse transcription was performed adding 2  
168 µl of DNase-treated RNA to 17 µl reaction mixture containing 1X Expand Reverse  
169 Transcriptase Buffer (Roche Diagnostics, Mannheim, Germany), 10mM of Dithiothreitol  
170 (DTT) solution (Roche diagnostics), 5 mM of dNTPs (New England BioLabs Inc., Glostrup,  
171 Denmark) and 250 nM of random hexamers (TAG Copenhagen A/S, Copenhagen, Denmark).  
172 After 2 min incubation at 42°C in a DNA engine DYAD™ Peltier Thermal Cycler (MJ

173 researchBio-Rad Laboratories, Hercules, CA), 1  $\mu$ l of Expand Reverse Transcriptase (Roche  
174 Diagnostics) was added to the mixture and incubated at 42°C for 40 min followed by 30 min  
175 at 50°C and 15 min at 72°C. RNA template addition was in the range of 8 – 300 ng.

176

### 177 **Amplicon sequencing and sequences analysis**

178 PCR amplification of the bacterial and archaeal 16S rRNA and 16S rRNA gene V4 region  
179 fragment was performed using the primer pair 515F/806R (Caporaso et al. 2012) for all  
180 samples (Table S1). The primers used for amplicon sequencing of the 16S rRNA gene were  
181 selected following the Earth Microbiome Project recommendation  
182 (<http://www.earthmicrobiome.org/emp-standard-protocols/>) representing the best choice at the  
183 initiation of the study. The primer 806R was previously modified to cover most available  
184 sequences in Genbank by Sundberg et al. (2013). More recently, these primers have been  
185 shown to be biased against Crenarcheota (Hugerth et al. 2014). Three  $\mu$ l of template (cDNA  
186 or DNA) were added to a 20  $\mu$ l-reaction mixture, consisting of 1X AccuPrime PCR Buffer II  
187 (Invitrogen), 0.2 U of AccuPrime *Taq* DNA Polymerase High Fidelity (Invitrogen) and 500  
188 nM of each primer. The PCR assay was performed in a DNA engine DYAD™ Peltier  
189 Thermal Cycler (Bio-Rad Laboratories) with the following conditions: 94°C for 2 min,  
190 followed by 35 cycles of 94°C for 20 s, 56°C for 30 s and 68°C for 40 s, and a final extension  
191 at 68°C for 5 min. PCR products were visualized on a 1% agarose gel. A second PCR using  
192 the same primers including adapters and indexes was performed under the same conditions as  
193 the previous PCR with the number of cycles reduced to 15. PCR amplicons were purified  
194 using Agencourt AMPure XP (Agencourt Bioscience Corporation, MA, USA) and  
195 concentration was measured using PicoGreen assay according to manufacturer's protocol  
196 (Invitrogen). To ensure equal representation of each sample, 50 ng of each 16S rRNA and  
197 rRNA gene purified sample amplicons were pooled together before sequencing. Then the



198 pooled mixture was purified and concentrated using the DNA Clean & Concentrator™-5  
199 (Zymo Research) followed by quantification with the Quant-iT dsDNA HS assay kit and the  
200 Qubit fluorometer (Invitrogen). A paired-end 250-bp sequencing run was performed using the  
201 Illumina MiSeq instrument according to the MiSeq™ Reagent Kit v2 Preparation Guide  
202 (Illumina, Inc., San Diego, CA, USA).

203 Raw read data was processed using the ILLUMITAG pipeline (Sinclair et al. 2015). In  
204 short, the read pairs from the 16S rRNA gene and 16S rRNA were demultiplexed and joined  
205 using the PANDAseq software v2.4 (Masella et al. 2012). Next, assembled reads (from here  
206 referred to as “reads”) that did not have the correct primer sequences at the start and end of  
207 their sequences were discarded. Reads were then filtered based on their PHRED scores.  
208 Chimera removal and OTU (operational taxonomic unit) clustering at 1% sequence  
209 dissimilarity was performed by pooling all reads from all samples (but separately for genomic  
210 16S rRNA and 16S rRNA) together and applying the UPARSE algorithm v7.0.1001 (Edgar  
211 2013). Here, any OTU containing less than two reads was discarded. Each OTU was  
212 subsequently taxonomically classified by operating a similarity search against the SILVAmod  
213 databases and employing the CREST assignment resource (Lanzen et al. 2012). Finally,  
214 plastid and mitochondrial OTUs were removed.

215 We obtained a total of 4 965 761 sequence reads (including both, the 16S rRNA and 16S  
216 rRNA gene), from which 4 811 127 sequences belonged to the domain Bacteria and 15 444 to  
217 the domain Archaea. Bacterial and archaeal sequences were analysed together as the  
218 combined prokaryote community. Prior to estimating alpha diversity, to minimize the impact  
219 of varying sequencing depth among the samples, the reads were rarefied to 5315 and 5455  
220 sequences per sample for RNA and DNA, respectively. Three RNA and 2 DNA samples were  
221 excluded due to low number of sequences (Table S1). Prokaryote richness and evenness  
222 (alpha diversity) were estimated using the Chao1 and Pielou’s indices, where a Pielou index



223 of 1 represents absolute evenness. Prior to beta-diversity analyses and to avoid excluding  
224 samples, the number of reads for individual samples were rarefied to the minimum number of  
225 sequences observed per sample: 3331 and 3348 sequences for 16S rRNA and the 16S rRNA  
226 gene, respectively.

227

## 228 **Shotgun metagenome sequencing, assembly and annotation**

229 Shotgun sequencing was performed on samples from depths B (11-15 cm) and D (19-23 cm),  
230 (Table S1). Depth B corresponds to the level around which the mean growing season water  
231 table occurs, which is the depth horizon with the most metabolic activity. Depth D is below  
232 the growing season water table level fluctuations and, thus, continuously anoxic. 1 ng of each  
233 DNA sample (from B and D depths) were used for tagmentation using the Nextera XT  
234 (Illumina, Inc., San Diego, CA, USA), according to manufacturer's instructions. Tagmented  
235 samples were purified using Agencourt AMPure XP (Agencourt Bioscience Corporation,  
236 MA, USA). Purified samples were visualized on a 1% agarose gel to ensure the libraries range  
237 was within 300-1000 bp. Libraries concentrations were measured with Quant-iT dsDNA HS  
238 assay and the Qubit fluorometer (Invitrogen). To ensure equal representation of each sample,  
239 10 ng of each sample library were pooled together before sequencing. A paired-end 150-bp  
240 sequencing run was performed using the Illumina Rapid Run on an Illumina HiSeq 2500  
241 platform (Illumina, Denmark), according to manufacturer's instructions.

242 The obtained reads were quality-trimmed using Sickle (Joshi & Fass 2011), and all  
243 samples were co-assembled with a range of k-mer values (from 31 to 101 with increments of  
244 10) using Ray (Boisvert et al. 2012). The resulting assemblies were subsequently fragmented  
245 *in silico* into successive sequences of 2000 base pairs overlapping by 1900 bp and were then  
246 merged using 454 Life Sciences's software Newbler (Roche, Basel, Switzerland) as  
247 previously described (Hugerth et al. 2015). The clean reads of all samples were mapped to the

248 merged assembly using Bowtie (Langmead & Salzberg 2012) after processing with SAMtools  
249 (Li et al. 2009). Duplicates were removed using Picard (Broad Institute, Cambridge, MA,  
250 USA). Finally, coverage was computed using BEDTools (Quinlan & Hall 2010). PFAM  
251 (protein families) annotation was performed using HMMer (Eddy 2011) using the PFAM A  
252 database (Finn et al. 2014). For each sample, the coverage of all detected PFAMs was  
253 normalized by dividing it by the mean coverage of a set single copy PFAMs (Rinke et al.  
254 2013) in order to compile the coverage in a “per genome equivalent” form. PFAM tables  
255 standardized to genome equivalents were resampled by removing PFAMs with smaller  
256 genome equivalents than the highest minimum genome equivalent ( $6.9 \times 10^{-4}$ ) of sample  
257 NxGH.

258

### 259 **Statistical analyses**

260 The multifactorial experiment consists of three treatment factors at two levels ( $2^3$ -design) with  
261 field duplicates for each treatment. Thus, the statistical evaluation is based on  $n=8$  for the  
262 main factors N, S and GH and  $n=4$  for the 2-way interaction treatments (NxS, NxGH and  
263 SxGH) and  $n=2$  for the 3-way interaction (NxSxGH), see Table S2 for the treatment effect  
264 evaluation matrix. After 10 years of treatment, the addition of N had significantly reduced the  
265 distance between the mire surface and the growing season average water table (Eriksson et al.  
266 2010b). To account for this gradual change and the inherent variation among the plots, the  
267 sampled depths were classified according to their positions relative to the average growing  
268 seasonal water table level within each plot as given by (Eriksson et al. 2010a), (Table S3).  
269 This resulted in three different depth horizons: an upper layer above the growing season mean  
270 water table level, which will be the most oxic of the three (AWT), a layer around the growing  
271 season mean water table level (WT) and a third layer below the growing season mean water  
272 table level characterized by permanent anoxic conditions (BWT).

273 ANOVA was applied to test for the effects of the treatments on the prokaryotic alpha-  
274 diversity. Permutation analysis of variance (PERMANOVA) was applied to test the  
275 hypothesis that the prokaryotic community composition and its functional potential differed  
276 among the treatments. To assess whether the microbial composition turnover in the treatment  
277 plots followed the same direction, ordination by non-metric multidimensional scaling was  
278 used. In order to understand how the response of the microbial community was distributed  
279 across the different phyla, we used the integrated occurrence of each phylum along the entire  
280 peat profiles and calculated the average change in their relative abundance derived from the  
281 16S rRNA for the high treatment levels in relation to their corresponding low levels. The  
282 phyla were sorted according to their relative abundance in the combined 16S rRNA dataset  
283 and are presented with either positive or negative responses to the treatments. In this context,  
284 it should be noted that changes at the phylum level might only be a rough representation of  
285 changes in the functional capacity of the communities. To assess individual metabolic traits in  
286 the different treatments, we applied generalized linear models (GLMs) on genome equivalent  
287 standardized PFAMs across the different treatments. We focused on PFAMs predicting key  
288 enzymes involved in the anaerobic degradation of soil organic matter, as well as  
289 methanotrophy (Table S4). The resulting differentially abundant categories (taxa or functional  
290 subsystems) among samples were identified based on  $p < 0.05$  and false discovery rate was  
291 estimated (Benjamini & Hochberg 1995). A distance-based redundancy analysis (db-RDA)  
292 was applied to explore possible multiple linear correlations between the microbial community  
293 composition and the vegetation composition previously reported (Eriksson et al. 2010b).  
294 Correspondence between the different data sets was investigated using procrustes  
295 superimposition combined with a randomisation test (Peres-Neto & Jackson 2001). Bray-  
296 Curtis distance was used when a distance matrix was required applying 999 permutations. The  
297 statistic discrimination throughout the analyses was at a significance level of 0.05.

298

## 299 **Nucleotide sequence accession numbers**

300 The sequence data generated in this study was deposited to the NCBI Sequence Read Archive  
301 and is accessible through accession number PRJEB14741.

302

## 303 **Results**

### 304 **Microbial community composition**

305 High throughput sequencing data was used to follow prokaryotic community composition and  
306 metabolic traits responding to the perturbations in the factorially designed experiment. High  
307 concordance was observed between the 16S rRNA gene and 16S rRNA-derived community  
308 compositions, as determined by procrustes superimposition ( $p = 0.001$ ,  $R = 0.9$ ; Table S5).

309 Comparisons of treatments revealed that the three main factors (nitrogen (N), sulfate (S) and  
310 warming (GH)) significantly affected the prokaryote community compositions (i.e. the beta-  
311 diversity; Table 1). In all cases, enhanced inorganic N deposition (high level) significantly  
312 affected the community composition at all depth horizons, contributed the most to the  
313 explained variance (Table 1), and showed the highest degree in dissimilarity compared to the  
314 ambient N (low level) (Fig. 1). In contrast to beta-diversity describing compositional changes  
315 (as determined by Bray-Curtis distances), alpha-diversity assessed as prokaryotic richness and  
316 evenness estimates, revealed only few significant responses to the perturbations (Table 1).  
317 Richness increased with the warming effect, while evenness overall decreased as a result of  
318 all the perturbations (Fig. S1).

319 The combined perturbations (i.e. high levels of NxS, NxGH, SxGH and NxSxGH) caused  
320 significant interactive effects that shifted the prokaryotic community (i.e. the beta-diversity:  
321 Table 1 and Fig. 1). For example, the 16S rRNA gene-derived prokaryotic community (beta-  
322 diversity) response to warming increased with enhanced N deposition in the two upper

323 horizons, while enhanced S deposition significantly increased the warming effect below the  
324 water table. Such synergistic effects were also observed when combining N and S deposition.  
325 While treatment interactions appeared to be additive as based on the observation that the  
326 dissimilarity among communities increased when applying multiple perturbations, their  
327 directionality were not consistent (Fig. 1 and Fig. S2). This implies that communities  
328 experiencing impacts from multiple perturbations do not merely change in a linear fashion  
329 based on combinations of individual perturbations, but are emerging in response to the  
330 establishment of unique communities for a particular combination of effectors. For example,  
331 enhanced N deposition combined with another perturbation (NxS, NxGH and NxSxGH)  
332 tended to cause greater community changes compared to the single perturbations at the two  
333 upper layers (Fig. 1a and 1b). Below the growing season mean water table (BWT) horizon,  
334 the amplitudes of the community composition responses in comparison to the control were  
335 similar for all perturbations (Fig. 1c).

336 There was concordance between beta diversity of the plant vegetation, derived from  
337 Wiedermann et al. (2007), and the peat prokaryote community at all three depth horizons, as  
338 revealed by procrustes superimposition ( $p = 0.001$ ,  $R = 0.4 - 0.7$ ; Table S5). In addition, db-  
339 RDA analyses revealed that the prokaryotic composition in the treatments receiving  $\text{NH}_4\text{NO}_3$   
340 (high N) were positively correlated with the relative abundance of the dominant vascular  
341 plants (*E. vaginatum*, *A. polifolia* and *V. oxycoccus*) and negatively correlated with total  
342 *Sphagnum* and *S. balticum* coverage (Fig. S3).

343 Bacterial and archaeal 16S rRNA gene sequences and expressed 16S rRNA sequences  
344 were classified into 31 and 33 phyla, respectively. The main phyla were Verrucomicrobia and  
345 Acidobacteria accounting respectively for 39% and 26% of the reads in the 16S rRNA gene-  
346 derived community, while Acidobacteria accounted for 36% and Proteobacteria for 23% of  
347 the reads in the 16S rRNA-derived community. The abundance of the different phyla was

348 clearly and differentially affected by the perturbations (Fig. 2). For example, the phyla  
349 Acidobacteria, Firmicutes, and Armatimonadetes decreased in relative abundance in response  
350 to all the treatments, while Chlorobi, Euryarchaeota, Fibrocateretes, and Tenericutes showed  
351 the opposite response. Verrucomicrobia and Actionabacteria increased in response to the main  
352 N effect and decreased in the other treatments, while candidate phylum BD1-5 had the  
353 opposite response. Cyanobacteria and Fusobacteria, increased in response to the main  
354 warming effect while for all the other treatments decreased and disappeared, respectively.  
355 Dictyoglomi increased with N, GH and NxGH while disappeared with all the other  
356 treatments. Thaumarchaeota and candidate division TM7 disappeared with warming while  
357 increased with N, S and NxS perturbations.

358

### 359 **Microbial metabolic traits**

360 In addition to responses in the composition of operational taxonomic units and taxonomic  
361 groups at the phylum level, we assessed the treatment responses with regards to genome-  
362 encoded metabolic traits from shotgun metagenomic data. In total, protein-coding genes  
363 matching 4957 protein families (PFAMs) were found from the 31 metagenomes. Overall  
364 responses in the functional potential as determined by estimating Bray-Curtis distances  
365 revealed that only enhanced N deposition (high -N) caused a significant shift in functional  
366 attributes, and this was only observed below the water table (Table 1). There was also a  
367 significant interactive effect when warming and increased S deposition perturbations were  
368 combined (Table 1).

369 Moreover, we specifically searched for marker genes related to key steps in the anaerobic  
370 degradation of organic matter (e.g. nitrate- and sulfate reduction, hydrolysis, fermentation,  
371 methanogenesis) and aerobic methane and ammonia oxidation (Table S4). From 1057  
372 possible responses at each depth horizon, merely 24 significant responses ( $p < 0.05$ ; FDR of

373 0.30) could be extracted from above the growing season mean water table (AWT), while the  
374 corresponding number in samples from below the growing season mean water table (BWT)  
375 was 30. At the AWT horizon, a few genes encoding for key steps in processes such as  
376 methanogenesis, sulfate reduction, nitrate reduction, sulfur oxidation, nitrogen fixation,  
377 syntrophy and hydrolysis, responded significantly to the experimental treatments (Fig. 3a).  
378 The majority of significant responses were connected to the 2-way interactive terms (NxS,  
379 NxGH and SxGH). Marker genes for methanogenesis significantly decreased in response to  
380 the main effects (N, S and GH), with amplification effects connected to the NxSxGH  
381 interaction, while they increased in response to the 2-way interactive terms. Genes encoding  
382 for proteins involved in dissimilatory sulfate reduction increased under enhanced S  
383 deposition, with amplification effects under the three-way perturbation and a decrease in the  
384 response when combined with warming or N.

385 At the BWT horizon, only a few genes encoding for methanogenesis, sulfate reduction,  
386 nitrate reduction, sulfur oxidation, syntrophy, and hydrolases responded significantly to the  
387 treatments. At this horizon the majority of the responses were connected to warming and  
388 enhanced S deposition, both resulting in a decrease of the different metabolic potentials,  
389 except for sulfate reduction that increased with the elevated S deposition (Fig. 3b). However,  
390 the few significant effects of the 2- and 3-way interactions with S or GH seemed to counteract  
391 these responses, resulting in an increase of the respective metabolic traits. For example,  
392 marker genes for methanogenesis, as observed for the AWT horizon, significantly decreased  
393 in response to the individual S and GH effects but increased in response to the NxS and  
394 NxSxGH perturbations. Genes encoding for hydrolases were the most affected among the  
395 studied metabolic traits, and mainly decreased with warming and enhanced S deposition as  
396 well as with simultaneous increase in N and S depositions.

397



## 398 **Co-variations between ecosystem functions and genetics in the light of perturbations**

399 Taxonomic composition and genome-encoded traits were tightly coupled ( $p = 0.001$ ,  $R =$   
400  $0.87$ ; Table S5). The previously reported realized methane production (Eriksson et al. 2010a),  
401 and the taxonomic composition data at 16S rRNA level were strongly related to each other  
402 across the different treatments and depth horizons (Table 2). However, genome-encoded  
403 functional traits as assessed from shotgun metagenomic data, including marker genes for  
404 methanogenesis and methanotrophy, did not correspond with measured function (i.e. methane  
405 production and oxidation; data no shown).

406

## 407 **Discussion**

408 The long field experiment at the Degerö Stormyr peatland was established to investigate the  
409 effects of increased nitrogen (N) and sulfur (S) deposition as well as warming on methane and  
410 carbon dynamics in boreal oligotrophic mires (Granberg et al. 2001). Here we report on  
411 interactive long-term effects after 18 years of multiple perturbations on prokaryotic taxonomic  
412 diversity and genome-encoded traits, as well as their relationship with ecosystem-scale  
413 processes of interest (*i.e.* methane cycling, organic matter degradation and plant composition).  
414 The microbial taxonomic composition largely corresponds with results from previous studies  
415 of peatlands (Lin et al. 2012, Serkebaeva et al. 2013, Tveit et al. 2013). Thus, the proportion  
416 of archaeal sequences at 0.3% of total prokaryotic sequences was in the range of what has  
417 previously been observed for peat ecosystems (Tveit et al. 2013 and references therein). We  
418 also show that where vascular plants (*E. vaginatum*, *A. polifolia* and *V. oxycoccus*) replaced  
419 *Sphagnum* under N amendments (Wiedermann et al. 2007, Eriksson et al. 2010b), also  
420 prokaryotic communities shifted in composition in response to N additions. The concordance  
421 between beta-diversity of the plant vegetation composition derived from Wiedermann et al.  
422 (2007) and the composition of the peat prokaryote community, confirms the tight coupling

423 between vegetation and microbes in the peat biome. The enrichments of roots at 10-15 cm  
424 into the peat vertical profile (Olid et al. 2017) likely play an essential role for this  
425 development by causing changes in organic matter composition and availability. The high  
426 level of N induced shifts in relative abundance among many phyla reported to harbour  
427 hydrolytic enzymes (Juottonen et al. 2017 and therein), i.e. increases in Proteobacteria and  
428 Actinobacteria, while Acidobacteria, Planctomycetes, and Bacteroidetes decreased.  
429 Interestingly, the decrease in Acidobacteria concomitantly with the relative increase in  
430 Proteobacteria may indicate a shift from the naturally nutrient poor conditions in the nutrient  
431 poor fen to more nutrient rich conditions because of the N amendment. In agreement with  
432 this, Lin et al. (2012) observed a higher abundance of Proteobacteria in rich fens compared to  
433 nutrient poor bogs. Since both phyla contain anaerobic carbohydrate polymer degrading  
434 representatives, these phyla may replace one another (cf. Schmidt et al. 2015) as result of  
435 changes in the type of carbohydrates supplied by the different plant communities forming the  
436 peat. The decrease in Cyanobacteria may reflect the decrease in *Sphagnum* abundance.  
437 Cyanobacteria occur in the hyalinic cell of the Sphagna lumina, where they have been shown  
438 to perform dinitrogen fixation (cf. Granhall & Selander 1973, Granhall & von Hofsten 1976,  
439 Berg et al. 2013). In addition to the taxonomic composition, also the genome-derived  
440 functional potential (PFAMs) was related to the composition of the vegetation. As such, our  
441 results fit the framework developed in studies of other soils subject to long-term N addition  
442 experiments, both with regards to microbial community composition and functional potential  
443 (Ramirez et al. 2010, Fierer et al. 2012, Leff et al. 2015, Zhou et al. 2015, Boot et al. 2016,  
444 Zeng et al. 2016), including grasslands, agricultural fields, agricultural black soils, and  
445 subalpine forests. For these systems, there is a consistent view that the shifts in microbial  
446 community composition and their metabolic functionality is due to the soil-plant-microbe  
447 interactions driven by N loading.

448 The significant relationships between prokaryotic community composition and methane  
449 oxidation and production, further emphasize the role of plant-prokaryotic interactions in  
450 regulating methane emissions. This is corroborated by the fact that all N amended to the plots  
451 is retained in the organic fraction of the peat (Eriksson 2010). However, responses in the  
452 overall set of genes, as well as the specific marker genes for methanogenesis and  
453 methanotrophy, did not match the patterns of observed methane production and consumption  
454 rates previously reported (Eriksson et al. 2010a). There are multiple possible explanations for  
455 the lack of correspondence, including an actual decoupling between gene abundance and their  
456 expression (Roling 2007, Freitag & Prosser 2009) or a high variability of the genomic content  
457 between individual samples. Also, temporal variation could play a role, as methane processing  
458 rates and genetic data were obtained during different years and locations within the treatment  
459 plots.

460 Similar to the elevated N deposition, also warming led to changes in prokaryotic  
461 community composition, supporting earlier findings of decreased methane production and  
462 emission rates while methane oxidation was unaffected (Eriksson et al. 2010a, Eriksson et al.  
463 2010b). Thus, the relative abundance of genes involved in methanogenesis decreased in  
464 response to warming, while other metabolic traits such as methanotrophy were largely  
465 unaffected. The observed decrease in the methanogenic potential may be explained by lower  
466 input of easily degradable organic matter to the anoxic zone due to oxygen-exposure in the  
467 upper layers with higher temperature (Nilsson & Öquist 2009). Thus, the organic matter will  
468 be more recalcitrant when it is transferred into the permanent anoxic layer. In favour of this  
469 explanation, there was a decrease in the hydrolytic potential below the water table level  
470 pinpointing to a lower degradability of the biopolymers at these strata.

471 The enhanced S deposition affected the microbial taxonomic composition at the water table  
472 and the anoxic horizons. Although S amendment in the field did not have any effects on

473 methane emissions, laboratory incubations of the methane producing-layers have shown a  
474 decrease in methane production by 55% in response to S amendments (Eriksson et al. 2010a,  
475 Eriksson et al. 2010b). This observation is supported by our results that the relative abundance  
476 of genes involved in methanogenesis were lower in the S-supplied plots. Below the water  
477 table, the observed decrease in hydrolytic and syntrophic potential combined with an increase  
478 of sulfate reduction potential, imply that organic matter degradation resulted in lower amounts  
479 of metabolic fermentation intermediates and H<sub>2</sub> available for methanogenesis.

480 Above the water table, the sulfate reduction potential increased concomitantly with the  
481 observed decrease in methanogenic potential as expected from the thermodynamic constraints  
482 (Abram & Nedwell 1978, Kristjansson et al. 1982). Some of the sulfide generated in this  
483 process is likely emitted to the atmosphere at the prevailing low pH, while experimentally  
484 added S over the years has contributed to a 50% larger S-pool under ambient climate and to a  
485 ~15% larger S-pool when combined with the greenhouse treatment (Granberg et al. 2001,  
486 Åkerblom et al. 2013). A re-oxidation of this residual S-pool would result in a continuous  
487 supply of oxidized sulfur compounds that would sustain sulfate reduction in these treatments.  
488 The increase of the photosynthetic sulfur oxidizers, here represented by the phylum Chlorobi,  
489 in response to essentially all perturbations and in particular the S amendments, supports the  
490 presence of an internal sulfur cycle (Pester et al. 2010, Pester et al. 2012). Such a sulfur cycle  
491 is suggested to be involved in the regulation of the ratio between carbon dioxide to methane  
492 formation in peatlands (Pester et al. 2010, Pester et al. 2012).

493 The nitrogen applied has been shown to be completely retained for the duration of the  
494 experiment in the form of nitrogenous organic matter (Eriksson 2010). Because of this, the  
495 amendment of N to these highly nitrogen-limited systems is not expected to enhance the  
496 occurrence of ammonia oxidation, dissimilatory nitrate reduction to ammonia or  
497 denitrification. This is supported by the lack of any significant response of genes encoding for

498 these processes in the N-amended plots. However, the 16S RNA analysis revealed that phyla  
499 hosting archaeal nitrifiers were present and increased in the plots with N addition. Especially,  
500 the positive response by groups within the Thaumarchaeota that have been shown to oxidize  
501 ammonia at very low levels, would potentially supply nitrite in the high-level N treatments.  
502 However, any nitrite formed would likely be immediately reduced by means of  
503 denitrification, anaerobic ammonium oxidation or assimilative or dissimilative reduction to  
504 ammonia.

505

## 506 **Conclusions**

507 Experimental long-term treatments mimicking anthropogenic perturbations altered the  
508 microbial communities at the taxonomic level and to some extent redistribute genes encoding  
509 microbial metabolic profiles including changes in ecosystem-relevant traits, such as sulfate  
510 reduction and methanogenesis, partly coinciding with expressed overall ecosystem functions.  
511 The results from the 18-years field manipulation experiment emphasizes that interactive  
512 effects of multiple anthropogenic perturbations on ecosystem services lead to idiosyncratic  
513 and hard to predict disturbance-responses in natural microbial communities when studying  
514 each perturbation in isolation. The observed additive effects of the treatments on community  
515 composition and function emphasize the need for studying interactions among multiple  
516 anthropogenic perturbations to understand ecosystem responses to climate change.

517

## 518 **Acknowledgements**

519 We thank Lucas Sinclair for bioinformatics support and the Uppsala Multidisciplinary Center  
520 for Advanced Computational Science (UPPMAX) for the computational and storage  
521 resources under projects b2014318. The project was mainly funded by the Swedish Research  
522 Council (contract no: 621-2011-4901) and additional research grants from the Swedish

523 Research Council Formas to MN and SB and from the Swedish Research Council to AE, BS,  
524 MN and SB further supported the study. We are thankful to FEMS for the research fellowship  
525 (FRF 2014-1) award (MM).

526

## 527 **References**

528

529 Abram JW & Nedwell DB (1978) Inhibition of Methanogenesis by Sulfate Reducing

530 Bacteria Competing for Transferred Hydrogen. *Archives of Microbiology*, 117: 89-92.

531 Åkerblom S, Bishop K, Björn E, Lambertsson L, Eriksson T & Nilsson M (2013) Significant

532 interaction effects from sulfate deposition and climate on sulfur concentrations

533 constitute major controls on methylmercury production in peatlands. *Geochimica et*

534 *Cosmochimica Acta* 1-11.

535 Andresen LC, Dungait JA, Bol R, Selsted MB, Ambus P & Michelsen A (2014) Bacteria and

536 fungi respond differently to multifactorial climate change in a temperate heathland,

537 traced with <sup>13</sup>C-glycine and FACE CO<sub>2</sub>. *PLoS One* 9: e85070.

538 Benjamini Y & Hochberg Y (1995) Controlling the false discovery rate: a practical and

539 powerful approach to multiple testing. *Journal of the Royal Statistical Society Series B*:

540 289-300.

541 Berg A, Danielsson Å & Svensson BH (2013) Transfer of fixed-N from N<sub>2</sub>-fixing

542 cyanobacteria associated with the moss *Sphagnum riparium* results in enhanced growth

543 of the moss. *Plant and Soil*: 271-278.

544 Boisvert S, Raymond F, Godzaridis E, Laviolette F & Corbeil J (2012) Ray Meta: scalable de

545 novo metagenome assembly and profiling. *Genome Biology* 13: R122.

546 Boot CM, Hall EK, Deneff K & Baron JS (2016) Long-term reactive nitrogen loading alters

547 soil carbon and microbial community properties in a subalpine forest ecosystem. *Soil*

548 *Biology and Biochemistry* 92: 211-220.

549 Bragazza L, Bardgett RD, Mitchell EA & Buttler A (2015) Linking soil microbial

550 communities to vascular plant abundance along a climate gradient. *New Phytologist*

551 205: 1175-1182.

552 Bridgham SD, Pastor J, Janssens JA, Chapin C & Malterer TJ (1996) Multiple limiting

553 gradients in peatlands: a call for a new paradigm. *Wetlands* 16: 45-65.

554 Caporaso JG, Lauber CL, Walters WA, *et al.* (2012) Ultra-high-throughput microbial

555 community analysis on the Illumina HiSeq and MiSeq platforms. *ISME J* 6: 1621-1624.

556 Castro HF, Classen AT, Austin EE, Norby RJ & Schadt CW (2010) Soil microbial

557 community responses to multiple experimental climate change drivers. *Applied and*

558 *Environmental Microbiology* 76: 999-1007.

559 Contosta AR, Frey SD & Cooper AB (2015) Soil microbial communities vary as much over

560 time as with chronic warming and nitrogen additions. *Soil Biology and Biochemistry*

561 88: 19-24.

562 Damman A (1988) Regulation of nitrogen removal and retention in *Sphagnum* bogs and other

563 peatlands. *Oikos* 51: 291-305.

564 Eddy SR (2011) Accelerated Profile HMM Searches. *PLoS Computational Biology* 7:

565 e1002195.

566 Edgar RC (2013) UPARSE: highly accurate OTU sequences from microbial amplicon reads.

567 *Nature Methods* 10: 966-988.

- 568 Eppinga MB, Rietkerk M, Belyea LB, Nilsson MB, De Ruiter PC & Martin JW (2010)  
569 Resource contrast in patterned peatlands increases along a climatic gradient. *Ecology*  
570 91: 2344-2355.
- 571 Eriksson T (2010) Boreal Mire Carbon Exchange. Dissertation. Serie: Acta Universitatis  
572 agriculturae Sueciae, 1652-6880; 2010:62
- 573 Eriksson T, Öquist MG & Nilsson MB (2010a) Production and oxidation of methane in a  
574 boreal mire after a decade of increased temperature and nitrogen and sulfur deposition.  
575 *Global Change Biology* 16: 2130-2144.
- 576 Eriksson T, Öquist MG & Nilsson MB (2010b) Effects of decadal deposition of nitrogen and  
577 sulfur, and increased temperature, on methane emissions from a boreal peatland. *Journal*  
578 *of Geophysical Research* 115: 1 -13.
- 579 Fierer N, Lauber CL, Ramirez KS, Zaneveld J, Bradford MA & Knight R (2012) Comparative  
580 metagenomic, phylogenetic and physiological analyses of soil microbial communities  
581 across nitrogen gradients. *ISME J* 6: 1007-1017.
- 582 Finn RD, Bateman A, Clements J, *et al.* (2014) Pfam: the protein families database. *Nucleic*  
583 *Acids Research* 42: D222-230.
- 584 Freitag TE & Prosser JI (2009) Correlation of methane production and functional gene  
585 transcriptional activity in a peat soil. *Applied and Environmental Microbiology* 75:  
586 6679-6687.
- 587 Galloway JN, Dentener FJ, D.G. C, *et al.* (2004) Nitrogen cycles: past, present, and future.  
588 *Biogeochemistry* 70: 153-226.
- 589 Gauci V, Matthews E, Dise N, Walter B, Koch D, Granberg G & Vile M (2004) Sulfur  
590 pollution suppression of the wetland methane source in the 20th and 21st centuries.  
591 *Proceedings of the National Academy of Sciences of the United States of America* 101:  
592 12583-12587.
- 593 Gorham E (1991) Northern peatlands: role in the carbon cycle and probable responses to  
594 climatic warming. *Ecological Applications* 1: 182-195.
- 595 Granberg G, Sundh I, Svensson BH & Nilsson M (2001) Effects of temperature, and nitrogen  
596 and sulfur deposition, on methane emission from a boreal mire. *Ecology* 82: 1982-1998.
- 597 Granhall U & Selander H (1973) Nitrogen fixation in a subarctic mire. *Oikos* 24: 8-15.
- 598 Granhall U & von Hofsten A (1976) Nitrogenase activity in relation to intracellular organisms  
599 in *Sphagnum* Mosses. *Physiologia plantarum* 36: 88-94.
- 600 Hugerth LW, Larsson J, Alneberg J, Lindh MV, Legrand C, Pinhassi J & Andersson AF  
601 (2015) Metagenome-assembled genomes uncover a global brackish microbiome.  
602 *Genome Biology* 16: 279.
- 603 Hugerth LW, Muller EE, Hu YO, Lebrun LA, Roume H, Lundin D, Wilmes P & Andersson  
604 AF (2014) Systematic design of 18S rRNA gene primers for determining eukaryotic  
605 diversity in microbial consortia. *PLoS One* 9: e95567.
- 606 Joshi NA & Fass JN (2011) Sickle: A sliding-window, adaptive, quality-based trimming tool  
607 for FastQ files (Version 1.33) [Software]. Available at <https://github.com/najoshi/sickle>.
- 608 Jouttonen H, Eiler A, Biasi C, Tuittila ES, Yrjala K & Fritze H (2017) Distinct Anaerobic  
609 Bacterial Consumers of Cellobiose-Derived Carbon in Boreal Fens with Different  
610 CO<sub>2</sub>/CH<sub>4</sub> Production Ratios. *Applied and Environmental Microbiology* 83: e02533-  
611 02516.
- 612 Kristjansson JK, Schonheit P & Thauer RK (1982) Different K<sub>s</sub> values for hydrogen of  
613 methanogenic bacteria and sulfate reducing bacteria – an explanation for the apparent  
614 inhibition of methanogenesis by sulfate. *Archives of Microbiology*, 131: 278-282.
- 615 Langmead B & Salzberg SL (2012) Fast gapped-read alignment with Bowtie 2. *Nature*  
616 *Methods* 9: 357-359.



- 617 Lanzen A, Jorgensen SL, Huson DH, Gorfer M, Grindhaug SH, Jonassen I, Ovreas L & Urich  
618 T (2012) CREST--classification resources for environmental sequence tags. *PloS One* 7:  
619 e49334.
- 620 Lawton JH & Brown VK (1993) Redundancy in ecosystems. In: (Schulze ED & Mooney HA,  
621 ed) *Biodiversity and Ecosystem Function*, Springer-Verlag Berlin, Germany, pp. 255-  
622 270.
- 623 Leff JW, Jones SE, Prober SM, *et al.* (2015) Consistent responses of soil microbial  
624 communities to elevated nutrient inputs in grasslands across the globe. *Proceedings of*  
625 *the National Academy of Sciences of the United States of America* 112: 10967-10972.
- 626 Li H, Handsaker B, Wysoker A, Fennell T, Ruan J, Homer N, Marth G, Abecasis G, Durbin R  
627 & Genome Project Data Processing S (2009) The Sequence Alignment/Map format and  
628 SAMtools. *Bioinformatics* 25: 2078-2079.
- 629 Li Q, Bai H, Liang W, Xia J, Wan S & van der Putten WH (2013) Nitrogen addition and  
630 warming independently influence the belowground micro-food web in a temperate  
631 steppe. *PloS One* 8: e60441.
- 632 Limpens J, Granath G, Gunnarsson U, *et al.* (2011) Climatic modifiers of the response to  
633 nitrogen deposition in peat-forming Sphagnum mosses: a meta-analysis. *New*  
634 *Phytologist* 191: 496-507.
- 635 Lin X, Green S, Tfaily MM, Prakash O, Konstantinidis KT, Corbett JE, Chanton JP, Cooper  
636 WT & Kostka JE (2012) Microbial community structure and activity linked to  
637 contrasting biogeochemical gradients in bog and fen environments of the Glacial Lake  
638 Agassiz Peatland. *Applied and Environmental Microbiology* 78: 7023-7031.
- 639 Martiny JB, Jones SE, Lennon JT & Martiny AC (2015) Microbiomes in light of traits: A  
640 phylogenetic perspective. *Science* 350: aac9323.
- 641 Masella AP, Bartram AK, Truszkowski JM, Brown DG & Neufeld JD (2012) PANDAseq:  
642 PAired-eND Assembler for Illumina sequences. *BMC Bioinformatics* 13.
- 643 McCalley CK, Woodcroft BJ, Hodgkins SB, *et al.* (2014) Methane dynamics regulated by  
644 microbial community response to permafrost thaw. *Nature* 514: 478-481.
- 645 Nielsen UN, Ayres E, Wall DH & Bardgett RD (2011) Soil biodiversity and carbon cycling: a  
646 review and synthesis of studies examining diversity-function relationships. *European*  
647 *Journal of Soil Science* 62: 105-116.
- 648 Nilsson M & Öquist M (2009) Partitioning Litter mass Loss Into Carbon Dioxide and  
649 Methane in Peatland Ecosystems. *Geophysical Monograph* 184: 131-144.
- 650 Nilsson M, Sagerfors J, Buffam I, Laudon H, Eriksson T, Grelle A, Klemmedtsson L, Weslien  
651 PER & Lindroth A (2008) Contemporary carbon accumulation in a boreal oligotrophic  
652 minerogenic mire - a significant sink after accounting for all C-fluxes. *Global Change*  
653 *Biology* 14: 2317-2332.
- 654 Olid C, Bindler R, Nilsson MB, Eriksson T & Klaminder J (2017) Effects of warming and  
655 increased nitrogen and sulfur deposition on boreal mire geochemistry. *Applied*  
656 *Geochemistry* 78: 149-157.
- 657 Peichl M, Sonnentag O & Nilsson MB (2014) Bringing color into the picture: using digital  
658 repeat photography to investigate phenology controls of the carbon dioxide exchange in  
659 a boreal mire. *Ecosystems* 18: 115-131.
- 660 Peres-Neto P & Jackson D (2001) How well do multivariate data sets match? The advantages  
661 of a Procrustean superimposition approach over the Mantel test. *Oecologia* 129: 169-  
662 178.
- 663 Pester M, Bittner N, Deevong P, Wagner M & Loy A (2010) A 'rare biosphere'  
664 microorganism contributes to sulfate reduction in a peatland. *ISME J* 4: 1591-1602.

- 665 Pester M, Knorr KH, Friedrich MW, Wagner M & Loy A (2012) Sulfate-reducing  
666 microorganisms in wetlands - fameless actors in carbon cycling and climate change.  
667 *Front Microbiol* 3: 72.
- 668 Phoenix GK, Emmett BA, Britton AJ, *et al.* (2012) Impacts of atmospheric nitrogen  
669 deposition: responses of multiple plant and soil parameters across contrasting  
670 ecosystems in long-term field experiments. *Global Change Biology* 18: 1197-1215.
- 671 Quinlan AR & Hall IM (2010) BEDTools: a flexible suite of utilities for comparing genomic  
672 features. *Bioinformatics* 26: 841-842.
- 673 Ramirez KS, Lauber CL, Knight R, Bradford MA & Fierer N (2010) Consistent effects of  
674 nitrogen fertilization on soil bacterial communities in contrasting systems. *Ecology* 91:  
675 3463-3470.
- 676 Rinke C, Schwientek P, Sczyrba A, *et al.* (2013) Insights into the phylogeny and coding  
677 potential of microbial dark matter. *Nature* 499: 431-437.
- 678 Rinnan R, Michelsen A, Bååth E & Jonasson S (2007) Fifteen years of climate change  
679 manipulations alter soil microbial communities in a subarctic heath ecosystem. *Global*  
680 *Change Biology* 13: 28-39.
- 681 Roling WF (2007) Do microbial numbers count? Quantifying the regulation of  
682 biogeochemical fluxes by population size and cellular activity. *FEMS Microbiology*  
683 *Ecology* 62: 202-210.
- 684 Roulet NT, Lafleur PM, Richard PJH, Moore TR, Humphreys ER & Bubier J (2007)  
685 Contemporary carbon balance and late Holocene carbon accumulation in a northern  
686 peatland. *Global Change Biology* 13: 397-411.
- 687 Schmidt O, Horn MA, Kolb S & Drake HL (2015) Temperature impacts differentially on the  
688 methanogenic food web of cellulose-supplemented peatland soil. *Environ Microbiol* 17:  
689 720-734.
- 690 Serkebaeva YM, Kim Y, Liesack W & Dedysh SN (2013) Pyrosequencing-based assessment  
691 of the bacteria diversity in surface and subsurface peat layers of a northern wetland,  
692 with focus on poorly studied phyla and candidate divisions. *PloS One* 8: e63994.
- 693 Shen R-C, Xu M, Chi Y-G, Yu S & Wan S-Q (2014) Soil Microbial Responses to  
694 Experimental Warming and Nitrogen Addition in a Temperate Steppe of Northern  
695 China. *Pedosphere* 24: 427-436.
- 696 Sinclair L, Ahmed O, Bertilsson S & Eiler A (2015) Microbial community composition and  
697 diversity via 16S rRNA gene amplicons: evaluating the Illumina platform. *PloS One* 10:  
698 e0116955.
- 699 Sundberg C, Al-Soud WA, Larsson M, Alm E, Shakeri Yekta S, Svensson BH, Sorensen SJ  
700 & Karlsson A (2013) 454-Pyrosequencing Analyses of Bacterial And Archaeal  
701 Richness In 21 Full-Scale Biogas Digesters. *FEMS Microbiology Ecology* 85: 612-626.
- 702 Tully BJ, Wheat CG, Glazer BT & Huber JA (2018) A dynamic microbial community with  
703 high functional redundancy inhabits the cold, oxic subseafloor aquifer. *ISME J* 12: 1-16.
- 704 Turetsky MR, Kotowska A, Bubier J, *et al.* (2014) A synthesis of methane emissions from 71  
705 northern, temperate, and subtropical wetlands. *Global Change Biology* 20: 2183-2197.
- 706 Turunen J, Tomppo E, Tolonen K & Reinikainen A (2002) Estimating carbon accumulation  
707 rates of undrained mires in Finland—application to boreal and subarctic regions. *The*  
708 *Holocene* 12: 69-80.
- 709 Tveit A, Schwacke R, Svenning MM & Urich T (2013) Organic carbon transformations in  
710 high-Arctic peat soils: key functions and microorganisms. *ISME J* 7: 299-311.
- 711 Wang M & Moore TR (2014) Carbon, nitrogen, phosphorus, and potassium stoichiometry in  
712 an ombrotrophic peatland reflects plant functional type. *Ecosystems* 17: 673-684.
- 713 Wiedermann MN, Nordin A, Gunnarsson U, Nilsson MB & Ericsson L (2007) Global change  
714 shifts vegetation and plant-parasite interactions in a boreal mire. *Ecology* 88: 454-464.

715 Yu ZC (2012) Northern peatland carbon stocks and dynamics: a review. *Biogeosciences* 9:  
716 4071-4085.  
717 Zeng J, Liu X, Song L, Lin X, Zhang H, Shen C & Chu H (2016) Nitrogen fertilization  
718 directly affects soil bacterial diversity and indirectly affects bacterial community  
719 composition. *Soil Biology and Biochemistry* 92: 41-49.  
720 Zhou J, Guan D, Zhou B, *et al.* (2015) Influence of 34-years of fertilization on bacterial  
721 communities in an intensively cultivated black soil in northeast China. *Soil Biology and*  
722 *Biochemistry* 90: 42-51.  
723  
724  
725  
726  
727  
728  
729  
730  
731  
732  
733  
734  
735  
736  
737  
738  
739  
740  
741  
742  
743  
744  
745  
746  
747  
748  
749  
750  
751  
752  
753  
754  
755  
756  
757  
758  
759  
760  
761  
762  
763  
764

765 **Table 1** Statistical tests for the 16S rRNA gene sequences, 16S rRNA sequences and protein  
 766 families derived from the metagenome (PFAM) in relation to the treatments and the  
 767 standardized depths: above the growing season water table (AWT), around the growing  
 768 season mean water table (WT), and below the growing season mean water table (BWT).  
 769 PFAMs were only analysed at the AWT and BWT depths. N, S and GH refer to the main  
 770 treatment effects of nitrogen, sulfur and greenhouse, and NxS, NxGH and SxGH refer to their  
 771 two-way interactions, while NxSxGH represents the three-way combination. Only R2-values  
 772 from the significant results of a permutational multivariate analysis of variance  
 773 (PERMANOVA) are presented. Similar for the alpha-diversity, only Pielou (evenness index)  
 774 and Chao (richness index) are represented from the significant results of an ANOVA.

| Data                 | Effect        | Standardized depth |         |                 |                |
|----------------------|---------------|--------------------|---------|-----------------|----------------|
|                      |               | AWT                | WT      | BWT             |                |
| Beta-diversity       | 16S rRNA gene | N                  | 0.25*** | 0.18**          | 0.08***        |
|                      |               | S                  | ns      | 0.06*           | 0.03*          |
|                      |               | GH                 | 0.07*   | 0.09**          | 0.05***        |
|                      |               | NxS                | ns      | 0.05*           | ns             |
|                      |               | NxGH               | 0.06*   | 0.05*           | ns             |
|                      |               | SxGH               | ns      | ns              | 0.03*          |
|                      |               | NxSxGH             | 0.05*   | ns              | 0.03*          |
|                      | 16S rRNA      | N                  | 0.15**  | 0.12*           | 0.09***        |
|                      |               | S                  | ns      | 0.07*           | 0.04**         |
|                      |               | GH                 | ns      | 0.06*           | 0.05**         |
|                      |               | NxS                | ns      | 0.05*           | 0.03*          |
|                      |               | NxGH               | ns      | ns              | ns             |
|                      |               | SxGH               | ns      | ns              | ns             |
|                      |               | NxSxGH             | ns      | ns              | ns             |
| Functional potential | PFAM          | N                  | ns      |                 | 0.14*          |
|                      |               | S                  | ns      |                 | ns             |
|                      |               | GH                 | ns      |                 | ns             |
|                      |               | NxS                | ns      |                 | ns             |
|                      |               | NxGH               | ns      |                 | ns             |
|                      |               | SxGH               | ns      |                 | 0.13*          |
|                      |               | NxSxGH             | ns      |                 | ns             |
| Alpha-diversity      | 16S rRNA gene | N                  | Pielou* | Chao*,Pielou**  | ns             |
|                      |               | S                  | ns      | Chao**          | Chao**;Pielou* |
|                      |               | GH                 | ns      | ns              | Chao*          |
|                      |               | NxS                | ns      | Pielou*         | ns             |
|                      |               | NxGH               | ns      | ns              | ns             |
|                      |               | SxGH               | ns      | Chao**;Pielou** | ns             |
|                      |               | NxSxGH             | ns      | ns              | Pielou*        |
|                      | 16S rRNA      | N                  | ns      | ns              | ns             |
|                      |               | S                  | ns      | ns              | Chao*;Pielou*  |
|                      |               | GH                 | ns      | ns              | ns             |
|                      |               | NxS                | ns      | ns              | ns             |
|                      |               | NxGH               | ns      | ns              | ns             |
|                      |               | SxGH               | ns      | ns              | ns             |
|                      |               | NxSxGH             | ns      | ns              | ns             |

775 Significances codes are: \*\*\*  $p \leq 0.001$ , \*\*  $p \leq 0.01$  and \*  $p \leq 0.05$ . ns denotes non-significant  
 776 results.

777 **Table 2** Co-variation between taxonomic composition and process data (methane production  
 778 and oxidation) assessed by fitting the process data onto an ordination derived from a non-  
 779 metric multidimensional scaling (NMDS), for every standardized depth (AWT: above the  
 780 growing season mean water table, WT: around the growing season water table (WT), and  
 781 BWT: below the growing season mean water table).  
 782

| Data                                      | Standardized depth | NMDS stress value | R2   | Significance |
|-------------------------------------------|--------------------|-------------------|------|--------------|
| 16S rRNA - CH <sub>4</sub> production     | AWT                | 0.12              | 0.35 | 0.02         |
|                                           | WT                 | 0.09              | 0.39 | 0.017        |
|                                           | BWT                | 0.06              | 0.51 | 0.004        |
| 16S rRNA gene -CH <sub>4</sub> production | AWT                | 0.07              | 0.34 | 0.0026       |
|                                           | WT                 | 0.09              | 0.20 | ns           |
|                                           | BWT                | 0.12              | 0.30 | ns           |
| 16S rRNA - CH <sub>4</sub> oxidation      | AWT                | 0.12              | 0.33 | ns           |
|                                           | WT                 | 0.09              | 0.01 | ns           |
|                                           | BWT                | 0.06              | 0.43 | 0.016        |
| 16S rRNA gene -CH <sub>4</sub> oxidation  | AWT                | 0.07              | 0.05 | ns           |
|                                           | WT                 | 0.09              | 0.31 | ns           |
|                                           | BWT                | 0.12              | 0.42 | 0.006        |

783 ns denotes non-significant results.

784  
 785  
 786  
 787  
 788  
 789  
 790  
 791  
 792  
 793  
 794  
 795  
 796  
 797  
 798  
 799  
 800  
 801  
 802  
 803  
 804  
 805  
 806  
 807  
 808

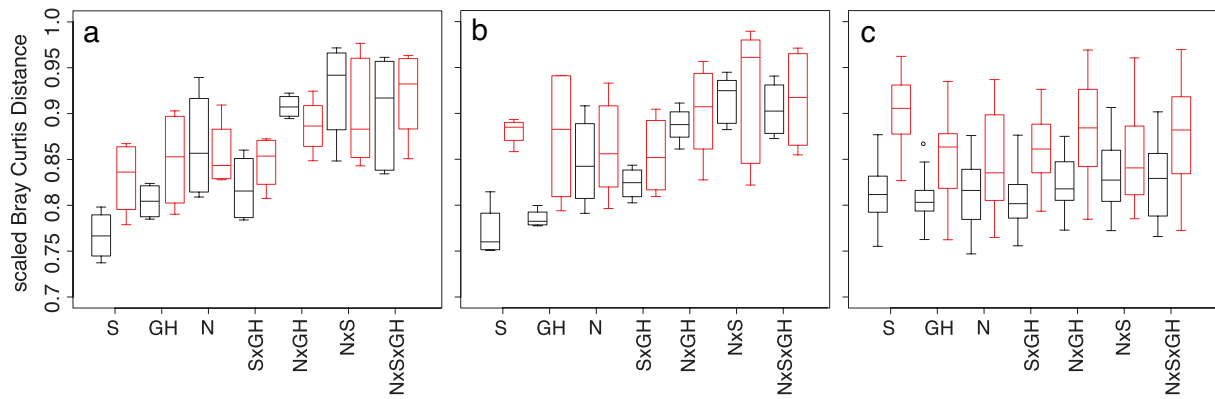

809  
810  
811  
812  
813  
814  
815  
816  
817  
818  
819  
820  
821  
822  
823  
824  
825  
826  
827  
828  
829  
830  
831  
832  
833  
834  
835  
836  
837  
838  
839  
840  
841  
842  
843  
844  
845  
846  
847  
848  
849

**Fig. 1** Prokaryote community composition ( $\beta$ -diversity) turnover in relation to the low treatment levels. a: above the growing season mean water table level. b: around the growing season mean water table level. c: below the growing season mean water table level. Black: community composition derived from the 16S rRNA gene. Red: community composition derived from the 16S rRNA. A Bray-Curtis distance of 0 indicates a complete overlap in community composition between the high and low treatment levels, while a Bray-Curtis distance of 1 indicates complete dissimilarity. Note that the scale on the y-axes starts at 0.7. The number of replicates for the main, two- and three-way interaction effects are 8, 4 and 2, respectively.

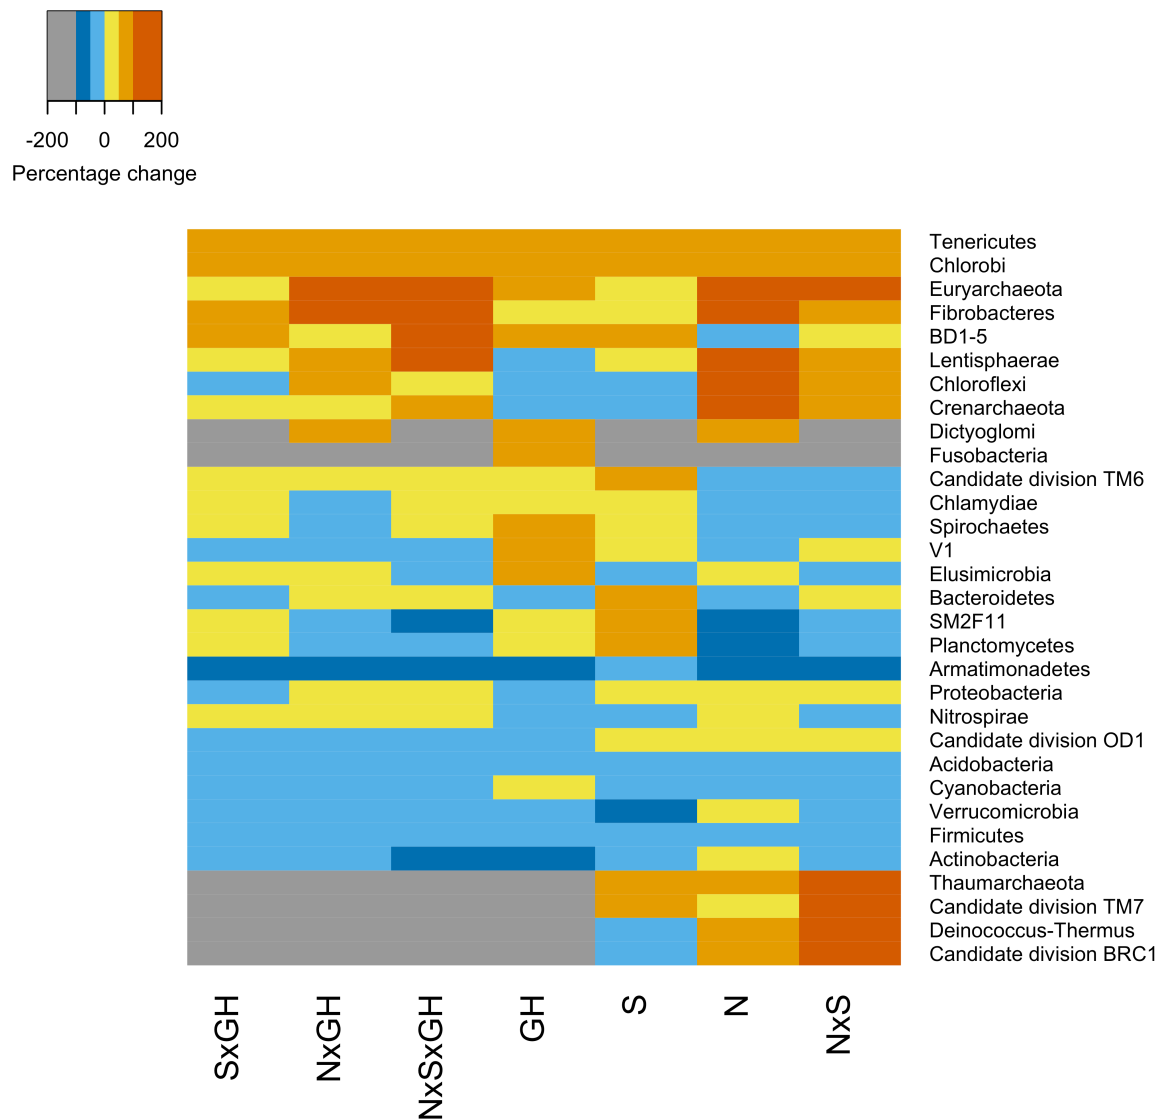

850  
 851 **Fig. 2** Relative change in the abundance of the 16S rRNA-derived phyla comparing the  
 852 high level and the low level treatments, i.e. the relative abundance of each phylum at the high  
 853 level was subtracted by the corresponding value for the low level and then divided with the  
 854 low level value. Grey colour shows the phyla that disappeared with the high level treatment  
 855 and red colour shows the phyla that appeared with the high level treatment. N, S and GH refer  
 856 to the main treatment effects of nitrogen, sulfur and greenhouse, and NxS, NxGH and SxGH  
 857 refer to their two-way interactions, while NxSxGH represents the three-way combination.  
 858  
 859  
 860  
 861  
 862  
 863  
 864



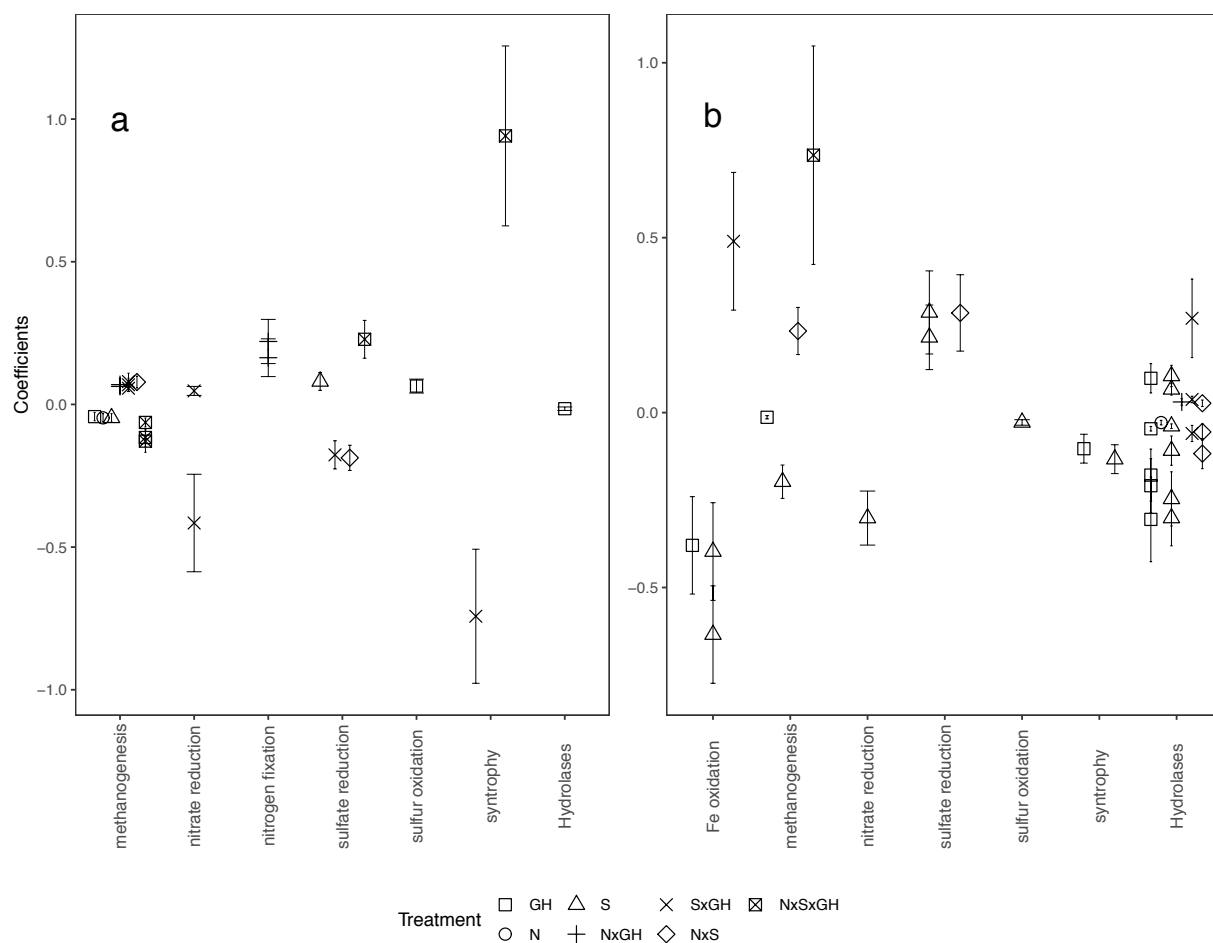

865  
866  
867  
868  
869  
870  
871  
872  
873  
874  
875  
876

**Fig. 3** Generalized linear models (GLMs) on PFAMs (protein families) related to key steps in the anaerobic degradation of organic matter or relevant to the N and S cycling, at above the water table (AWT; panel a) and below the water table (BTW; panel b). The treatment responses are indicated by the coefficient, showing a decrease or increase in genome equivalents of each individual key PFAM. Only significant treatments responses are shown. Interaction terms in the regression models and the relationships among the variables in the model should be interpreted in as follows: positive coefficient in the case of interactions indicates a synergistic effect when combining perturbations, while a negative coefficient indicates an antagonistic effect, which can even lead to no expression of the perturbations.
